# Supplementary material
Source: PubMed Central journal article supplement (PMC3184604)
Supplement: NIHMS327021-supplement-1.pdf [file NIHMS327021-supplement-1.pdf]

# Supplementary Figure 1

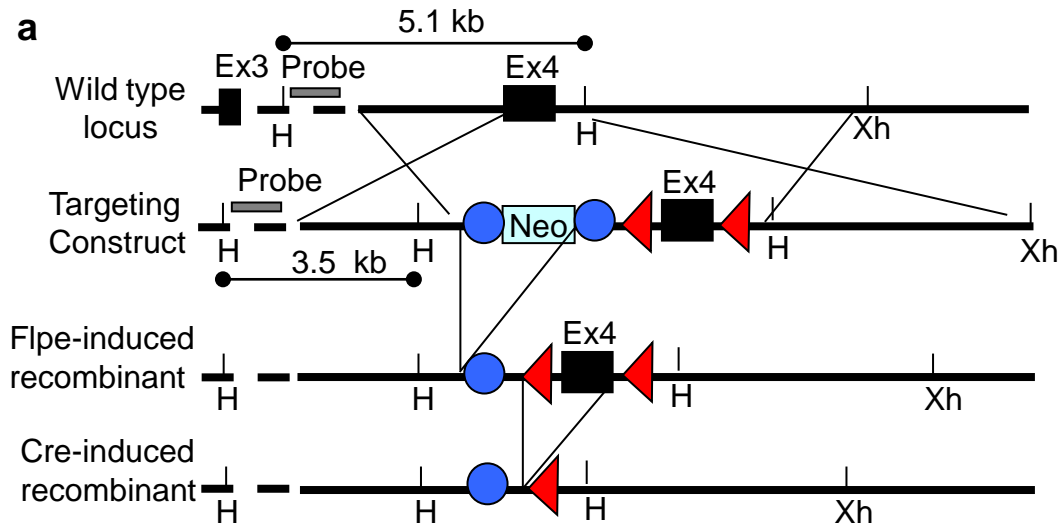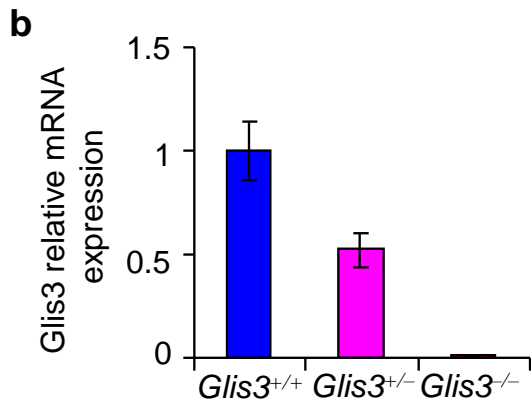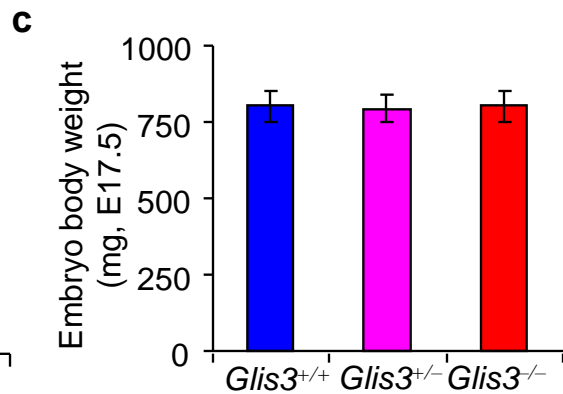

# Supplementary Figure 2

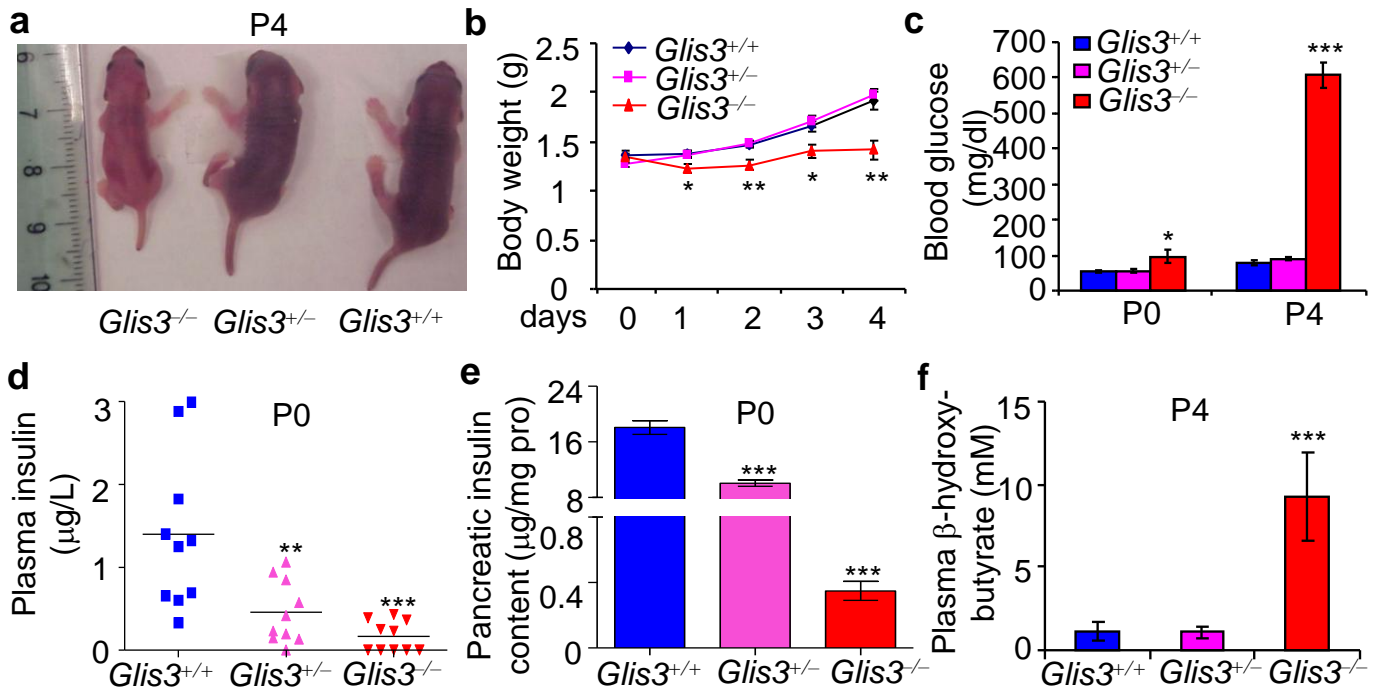

# Supplementary Figure 3

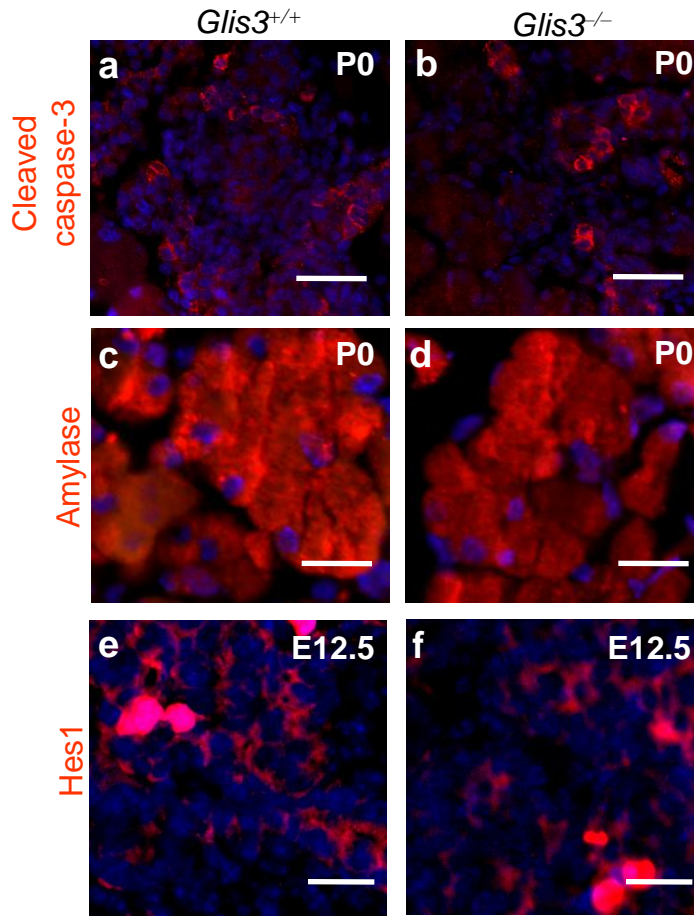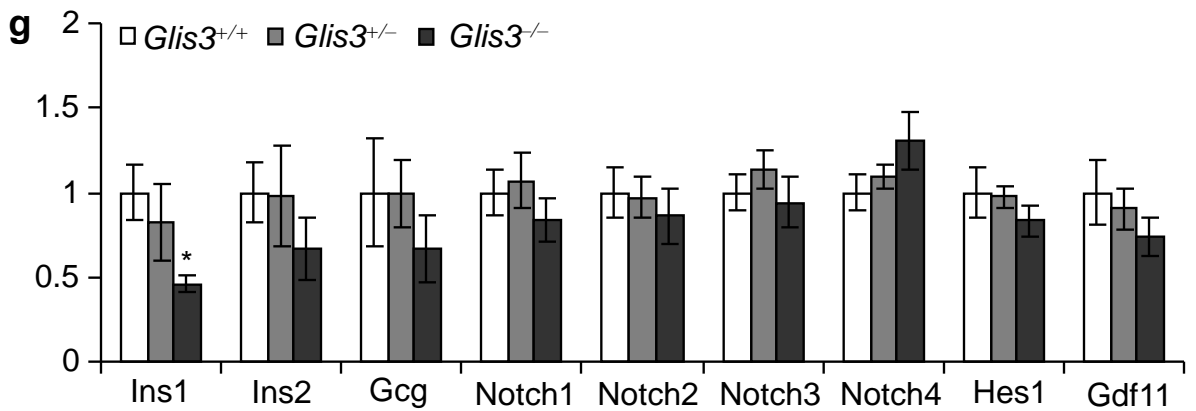

**Supplementary Table 1.** Body weight and pancreas weight of neonatal (P0) *Glis3*<sup>+/+</sup>, *Glis3*<sup>+/-</sup> and *Glis3*<sup>-/-</sup> mice

|                      | <i>Glis3</i> <sup>+/+</sup> (n=11) | <i>Glis3</i> <sup>+/-</sup> (n=21) | <i>Glis3</i> <sup>-/-</sup> (n=11) |
|----------------------|------------------------------------|------------------------------------|------------------------------------|
| Body weight (mg)     | 1312.6±106.4                       | 1313.7±115.1                       | 1311.1±98.3                        |
| Pancreas weight (mg) | 7.0±0.8                            | 7.6±1.4                            | 6.4±0.8                            |
| PW/BW                | 0.0054±0.0007                      | 0.0058±0.0009                      | 0.0049±0.0006                      |

## Supplementary Table 2. The sequences of qPCR primers and EMSA probe

| Target                  | Forward               | Reverse                |
|-------------------------|-----------------------|------------------------|
| <b>q-RT-PCR</b>         |                       |                        |
| <i>mGlis3</i>           | CAGTCCTAGCTTACCGAGG   | CTGGGAAGTGTGGCTGGATG   |
| <i>mNeurog3</i>         | GTCGGGAGAACTAGGATGGC  | GGAGCAGTCCCTAGGTATG    |
| <i>mIns1</i>            | GGAGCGTGGCTTCTTCTACA  | GGTGGGCCTTAGTTGCAGTA   |
| <i>mIns2</i>            | TTTGTCAAGCAGCACCTTTG  | TCTACAATGCCACGCTTCTG   |
| <i>mGlucagon</i>        | AGGAAGGCGAGACTTCCCAG  | CCCAAGTGAAGTGGCAGG     |
| <i>mSox9</i>            | TCCGGCATGAGTGAGGTGC   | CGTCGCTGCTCAGTTCACC    |
| <i>mHnf1b</i>           | CTTCATGGCCGCGGTGACTC  | GGGTCCTTGTTGCTGTGCAC   |
| <i>mHes1</i>            | GACTGTGAAGCACCTCCG    | TGGGTCATGCAGTTGGCCAG   |
| <i>mGdf11</i>           | GAGGACGAGTACCACGCTAC  | GATCTGCAGGTAGACTGTGGC  |
| <i>mNotch1</i>          | GTCGGCTTTGCATTGGGCGG  | TCCCGCGGCAATCGGTCCAT   |
| <i>mNotch2</i>          | TGTGGAGGCGACTCTTCTGC  | CAGGAGGCGAACGATGTC     |
| <i>mNotch3</i>          | ATGCCCGAATGGCAGATGGC  | TCAGCAGAGCCAAGGTAGCC   |
| <i>mNotch4</i>          | AACTGCACTGCACTGGGCCG  | CTCCAGCAACAGCTGCGCCA   |
| <i>mHnf6</i>            | TTCGGACCTGCTGCGAAAC   | ACGTCTGTGAAGACCAGCC    |
| <i>mFoxa2</i>           | TGGAAGGGCACGAGCCATCC  | CATTCCAGCGCCCACATAGG   |
| <i>rmPdx1</i>           | CTTCCCGAATGGAACCGAG   | GAATTCCTTCTCCAGCTCC    |
| <i>rmNeuroD1</i>        | GGCTCCAGGGTTATGAGATC  | GCATTCATGGCTTCAAGC     |
| <i>rmNkx6-1</i>         | CTATTCTCTGGGGATGACGG  | TCTCGTCGTCAGAGTTCGGGTC |
| <i>rmIsl1</i>           | CAGATGCGCTCATGAAGGAG  | AGCAGCCACCATGGGAGTTC   |
| <i>rmCyclophilin A</i>  | CTGTTTGCAGACAAAGTTCCA | AGGATGAAGTTCTCATCCTCA  |
| <b>ChIP-q-PCR</b>       |                       |                        |
| <i>mNeurog3</i> (-4692) | AGGAGAGGGACATATGGGC   | GTTTGTCCCAGCGTCTGG     |
| <i>mNeurog3</i> (-2862) | CTCCAGGCTTCTGGCTGTCCG | CCTGTTTTTACAGCGAGGGG   |
| <i>mNeurog3</i> (-2718) | ATTGGCACGCACTGCGCAG   | GAGGCCAAGCTGAATGCCCG   |
| <i>mNeurog3</i> (-1640) | CCCCACCCAATCCTACCAC   | GGCGTAGAGTCAGGGTCGG    |
| <i>mNeurog3</i> (-1117) | ACAAGAAGGGCGGGTCTGCA  | CACTCCTGAACTGTGGGTG    |
| <i>mNeurog3</i> (+7963) | CACACTCTCTGCATACGGAG  | CGTTCCTCCAACTGGGCTG    |

**Supplementary Table 2.** The sequences of qPCR primers and EMSA probe (*Continued*)

| EMSA probe              |                                          |
|-------------------------|------------------------------------------|
| <i>mNeurog3</i> (-4692) | GCATCTGTGTCCCCAGTTGCAGTTTCTGTG           |
| <i>mNeurog3</i> (-2862) | GGATGGATGACCCCTCGCTGTAAAAACAGG           |
| <i>mNeurog3</i> (-2718) | AGGGATCTGTGAGTCCCCTGCAGCTAAGGGAGAGGTTGTG |
| <i>mNeurog3</i> (-1640) | ATCCTACCACCTCCCCTCCTGCTGAGTGCC           |
| <i>mNeurog3</i> (-1117) | GAAGTCTCCCTGCCCTGGGCTCACCCACAG           |
